# Supplementary material for: Improving Early Prostate Cancer Detection Using Fragmentomics and Ensemble Machine Learning Models
Source: Research Square preprint supplement (doi:10.21203/rs.3.rs-6166592/v1), 2025-04-03
Supplement: Supplementary file 1 [file 99f26ee5d52fa52b10596693.xlsx]

## Sheet: Table S1
Table S1. Seqencing summary of 177 training samples.
sample	total reads	mapped reads	mapping rate	paired reads	read1	read2	properly paired reads	paired ratio	singletons	mate mapped to a different chr	mate mapped to a different chr (mapQ>=5)
BPH_H11_L	64425326	62393939	0.968469	64425326	32212663	32212663	60645994	0.941338	299987	80014	44931
BPH_H12_L	70161352	68088854	0.970461	70161352	35080676	35080676	66336744	0.945488	237652	124252	89776
BPH_H15_W	60685372	58861095	0.969939	60685372	30342686	30342686	57109832	0.941081	227827	73722	44092
BPH_H16_W	72582572	66776041	0.920001	72582572	36291286	36291286	65023752	0.895859	233633	69568	40604
BPH_H17_L	68089844	65835264	0.966888	68089844	34044922	34044922	63912844	0.938655	262944	88732	54259
BPH_H18_L	91650514	89253187	0.973843	91650514	45825257	45825257	86932878	0.948526	353383	126590	81700
BPH_H19_L	67706330	65957047	0.974164	67706330	33853165	33853165	64159950	0.947621	225873	131002	96125
BPH_H2_W	86133890	83570471	0.970239	86133890	43066945	43066945	81193988	0.942649	343633	113650	70376
BPH_H20_S	71780688	69984171	0.974972	71780688	35890344	35890344	68123272	0.949047	271879	103156	69199
BPH_H21_S	56890724	55269470	0.971502	56890724	28445362	28445362	53732846	0.944492	215536	56028	29829
BPH_H22_L	64100980	62110377	0.968946	64100980	32050490	32050490	60392468	0.942146	258455	74892	44693
BPH_H24_W	74394714	72057841	0.968588	74394714	37197357	37197357	70215212	0.94382	334549	94272	54036
BPH_H25_W	63377692	61726537	0.973947	63377692	31688846	31688846	60118694	0.948578	215889	104062	73862
BPH_H27_L	61721994	59993521	0.971996	61721994	30860997	30860997	58484044	0.94754	214429	73380	44298
BPH_H29_L	68260382	66397134	0.972704	68260382	34130191	34130191	64517990	0.945175	260642	183562	144041
BPH_H30_W	69462342	67183011	0.967186	69462342	34731171	34731171	65363444	0.940991	273377	178798	134896
BPH_H31_W	77136630	75170011	0.974505	77136630	38568315	38568315	72995092	0.946309	316275	276822	221751
BPH_H32_W	62263708	60593202	0.97317	62263708	31131854	31131854	58726434	0.943189	259710	178366	139517
BPH_H33_W	99041974	96028604	0.969575	99041974	49520987	49520987	93444088	0.94348	412610	265758	205083
BPH_H37_L	64429168	62545277	0.97076	64429168	32214584	32214584	60698128	0.942091	312901	237748	191231
BPH_H39_L	81160796	78756582	0.970377	81160796	40580398	40580398	76527134	0.942908	324970	324282	270266
BPH_H40_W	70360064	68380722	0.971868	70360064	35180032	35180032	66315352	0.942514	326302	373116	315537
BPH_H42_W	81009006	78719744	0.971741	81009006	40504503	40504503	76303308	0.941911	355390	265284	209696
BPH_H43_W	61878470	60118260	0.971554	61878470	30939235	30939235	58258148	0.941493	270370	235038	189938
BPH_H44_W	70216470	68339577	0.97327	70216470	35108235	35108235	66510070	0.947215	248463	156936	119221
BPH_H61_L	56392680	54396279	0.964598	56392680	28196340	28196340	52880142	0.937713	241983	76764	46872
BPH_H64_L	65274686	63303474	0.969801	65274686	32637343	32637343	61637544	0.944279	276520	102112	66164
BPH_H66_L	65673300	63771372	0.97104	65673300	32836650	32836650	61960448	0.943465	252580	107098	72447
BPH_H67_W	59046846	56897186	0.963594	59046846	29523423	29523423	55263956	0.935934	324356	70230	41369
BPH_H69_W	65152940	63202952	0.970071	65152940	32576470	32576470	61463058	0.943366	276906	87366	54202
BPH_H70_W	56995602	55304420	0.970328	56995602	28497801	28497801	53809960	0.944107	233090	78584	51354
BPH_H71_L	81374534	79247372	0.97386	81374534	40687267	40687267	76947216	0.945593	282576	193300	147367
BPH_H72_L	64616972	62976870	0.974618	64616972	32308486	32308486	61219924	0.947428	211640	153112	116724
BPH_H74_W	59170890	57341806	0.969088	59170890	29585445	29585445	55891652	0.94458	236960	84334	52910
BPH_H77_W	70127124	67910636	0.968393	70127124	35063562	35063562	66131138	0.943018	273024	94582	59676
BPH_H78_W	58008584	56044076	0.966134	58008584	29004292	29004292	54607804	0.941375	206302	54834	29259
BPH_H80_L	76043468	73753832	0.96989	76043468	38021734	38021734	71631842	0.941985	341172	133164	91571
BPH_H81_L	62031494	60349196	0.97288	62031494	31015747	31015747	58808128	0.948037	229160	103746	74080
BPH_H82_L	65842984	63853371	0.969782	65842984	32921492	32921492	62100488	0.94316	274879	123650	88091
BPH_H83_W	59372352	57552845	0.969354	59372352	29686176	29686176	55881988	0.941212	213405	117738	86127
BPH_H85_W	75167718	73280604	0.974895	75167718	37583859	37583859	71219294	0.947472	285030	220386	174949
BPH_H87_L	67621658	65654116	0.970904	67621658	33810829	33810829	63587984	0.940349	280574	284494	233188
BPH_H88_W	56258658	54589271	0.970327	56258658	28129329	28129329	52653690	0.935922	368733	445402	377034
BPH_H89_L	82648560	80533703	0.974411	82648560	41324280	41324280	78436836	0.949041	287395	241944	193178
BPH_H90_W2	59676002	57887305	0.970027	59676002	29838001	29838001	56214736	0.941999	244461	103180	71245
BPH_H91_W	74360276	72213011	0.971123	74360276	37180138	37180138	70015756	0.941575	294601	115036	76957
BPH_H92_W	76624018	74269512	0.969272	76624018	38312009	38312009	72235286	0.942724	254874	124386	89486
BPH_H96_W	64042838	62040376	0.968732	64042838	32021419	32021419	60303498	0.941612	266342	86186	54823
BPH_H97_W	59684090	57635383	0.965674	59684090	29842045	29842045	56229190	0.942114	244971	72504	42915
H1_W	59231622	57233621	0.966268	59231622	29615811	29615811	55627212	0.939147	231993	83552	52027
H3_W	63883928	61988531	0.970331	63883928	31941964	31941964	60251236	0.943136	238233	86638	55127
H4_W	77783014	75771081	0.974134	77783014	38891507	38891507	73902642	0.950113	274055	88192	52056
H45_W	61355668	59215659	0.965121	61355668	30677834	30677834	57669318	0.939918	226577	101890	71346
H47_L	60049524	57955729	0.965132	60049524	30024762	30024762	56334950	0.938141	244031	104382	72783
H5_L	76715366	73847542	0.962617	76715366	38357683	38357683	71718574	0.934866	262166	108518	71861
H6_L	84560032	82123478	0.971186	84560032	42280016	42280016	79701600	0.942545	344434	137426	88551
M10_L	9427858	9191610	0.974941	9427858	4713929	4713929	8938506	0.948095	32694	30248	24557
M100_L	58935470	57129891	0.969363	58935470	29467735	29467735	55476410	0.941308	222697	83584	55550
M11_W	88389782	85248084	0.964456	88389782	44194891	44194891	82881114	0.937678	317412	65716	27081
M114_W	75897494	73568528	0.969314	75897494	37948747	37948747	71498340	0.942038	358868	179366	129516
M115_W	63908168	61950801	0.969372	63908168	31954084	31954084	60178114	0.941634	266935	95728	63978
M117_W	64006416	61753781	0.964806	64006416	32003208	32003208	60090990	0.938828	242337	95908	62379
M12_W	62350556	60491742	0.970188	62350556	31175278	31175278	58765762	0.942506	249026	70152	38946
M120_W	59061034	57346283	0.970966	59061034	29530517	29530517	55758976	0.944091	235875	108894	77160
M122_W	56843164	55261303	0.972171	56843164	28421582	28421582	53760324	0.945766	217747	93336	62698
M123_L	66322894	64379043	0.970691	66322894	33161447	33161447	62507528	0.942473	252785	116356	79838
M128_W2	53001012	51468230	0.97108	53001012	26500506	26500506	50054390	0.944404	203350	91608	64342
M13_W	76436102	74281205	0.971808	76436102	38218051	38218051	72110266	0.943406	307965	111716	68134
M14_L	62513368	60626807	0.969821	62513368	31256684	31256684	58939004	0.942822	245243	89152	56176
M16_L	63595386	61869482	0.972861	63595386	31797693	31797693	60238134	0.947209	228890	77788	46132
M19_L	57000952	55077283	0.966252	57000952	28500476	28500476	53647818	0.941174	212139	61048	36370
M20_L	63100350	61025050	0.967111	63100350	31550175	31550175	59388062	0.941169	236810	78050	49007
M23_W	61492768	59695390	0.970771	61492768	30746384	30746384	58213260	0.946668	213964	77762	49885
M24_W	62535980	60152203	0.961882	62535980	31267990	31267990	58558170	0.936392	231357	83822	51316
M26_W	62629930	60299251	0.962786	62629930	31314965	31314965	58821130	0.939186	228009	83268	52397
M27_W	72606074	70418581	0.969872	72606074	36303037	36303037	68405536	0.942146	258107	102008	67431
M3_L1	61460754	59699937	0.971351	61460754	30730377	30730377	57961232	0.943061	230019	172416	135223
M34_W	55037716	52969598	0.962424	55037716	27518858	27518858	51548408	0.936602	224020	56210	30420
M35_L	59866632	58082819	0.970204	59866632	29933316	29933316	56647892	0.946235	204273	76802	49343
M36_L1	78145104	75707981	0.968813	78145104	39072552	39072552	73817970	0.944627	285897	129070	89188
M37_W	69126690	66909370	0.967924	69126690	34563345	34563345	65087256	0.941565	305452	89856	53068
M4_L	57329526	55755579	0.972546	57329526	28664763	28664763	54276304	0.946743	246697	157762	122676
M40_W	55630494	53802602	0.967142	55630494	27815247	27815247	52536998	0.944392	197766	51142	26036
M41_L	81460426	79323235	0.973764	81460426	40730213	40730213	77191920	0.9476	254939	144604	106419
M44_L	57949724	56333597	0.972112	57949724	28974862	28974862	54838788	0.946317	215107	78996	51204
M45_L	67642674	65327946	0.96578	67642674	33821337	33821337	63602456	0.940271	209874	92966	61733
M47_W	61078626	59547558	0.974933	61078626	30539313	30539313	57799780	0.946318	200080	114028	82740
M5_S	66379892	64470321	0.971233	66379892	33189946	33189946	62729298	0.945005	305235	241720	194902
M56_W	58867116	56700130	0.963189	58867116	29433558	29433558	55161276	0.937047	195596	79160	52607
M59_W	66752228	63995023	0.958695	66752228	33376114	33376114	62304166	0.933365	227391	86806	55780
M6_S	60998278	59291109	0.972013	60998278	30499139	30499139	57466186	0.942095	253683	201448	162354
M61_L	58123256	56413218	0.970579	58123256	29061628	29061628	54877652	0.94416	219618	89118	59464
M65_L	71325470	69434197	0.973484	71325470	35662735	35662735	67693692	0.949082	233769	110290	76983
M7_L	73610798	71015346	0.964741	73610798	36805399	36805399	69080768	0.93846	289404	186570	143309
M8_L	78982126	76771124	0.972006	78982126	39491063	39491063	74813000	0.947214	328166	225362	177180
M81_W	94913598	92195548	0.971363	94913598	47456799	47456799	89383054	0.941731	436610	321466	245829
M82_W	63918194	61975927	0.969613	63918194	31959097	31959097	60140094	0.940892	295261	138610	95789
M9_W	63271244	61442004	0.971089	63271244	31635622	31635622	59767122	0.944617	258516	71224	40007
M99_L	48017996	46284728	0.963904	48017996	24008998	24008998	44961470	0.936346	214078	43230	23464
PC_D1_L	59305308	56467335	0.952146	59305308	29652654	29652654	55032930	0.92796	190109	108654	77976
PC_D101_L	86917188	83873565	0.964982	86917188	43458594	43458594	81568780	0.938465	337403	222674	167933
PC_D105_W	72573072	70541351	0.972004	72573072	36286536	36286536	68494478	0.9438	277185	289516	241667
PC_D109_L	58641750	56130022	0.957168	58641750	29320875	29320875	54608614	0.931224	236278	139120	105499
PC_D113_L	99838372	94889369	0.95043	99838372	49919186	49919186	92337274	0.924868	400135	196092	143647
PC_D117_W	77200024	74868790	0.969803	77200024	38600012	38600012	72725552	0.942041	301962	284356	233987
PC_D121_L	69867210	66691174	0.954542	69867210	34933605	34933605	65007006	0.930437	272980	137288	100323
PC_D125_L	89345138	86713863	0.970549	89345138	44672569	44672569	84280998	0.943319	336561	228560	177046
PC_D129_L	99760906	96140198	0.963706	99760906	49880453	49880453	93666170	0.938907	315460	188854	137936
PC_D137_W	61999698	59718157	0.963201	61999698	30999849	30999849	57782964	0.931988	256355	179438	135919
PC_D149_L	64851664	62173637	0.958705	64851664	32425832	32425832	60336868	0.930383	271925	183088	135877
PC_D149_L	78983960	75242536	0.952631	78983960	39491980	39491980	72896372	0.922926	375330	283396	219407
PC_D161_L	87316328	81713304	0.935831	87316328	43658164	43658164	79316440	0.90838	348580	140310	93826
PC_D161_L2	58187714	55541971	0.954531	58187714	29093857	29093857	53821142	0.924957	312927	147820	100194
PC_D169_L	81572168	77858359	0.954472	81572168	40786084	40786084	75118182	0.92088	500575	471860	378638
PC_D169_L2	66533260	63612889	0.956107	66533260	33266630	33266630	61760330	0.928262	325561	112440	75323
PC_D17_W	53112656	50970722	0.959672	53112656	26556328	26556328	49424996	0.930569	254030	169868	132568
PC_D173_W	76237162	72807579	0.955014	76237162	38118581	38118581	70846632	0.929293	337131	126146	84635
PC_D177_W	68213842	65152505	0.955121	68213842	34106921	34106921	63243336	0.927133	332803	184210	133376
PC_D177_W2	78768814	74425157	0.944856	78768814	39384407	39384407	72117034	0.915553	477353	267404	203502
PC_D181_L	47282124	43861353	0.927652	47282124	23641062	23641062	42449814	0.897798	395979	114890	81562
PC_D185_L	52797030	50224077	0.951267	52797030	26398515	26398515	48529768	0.919176	333583	243814	190995
PC_D193_L	63879214	60070909	0.940383	63879214	31939607	31939607	57262424	0.896417	717717	728996	582314
PC_D197_W2	105394888	99916662	0.948022	105394888	52697444	52697444	95701322	0.908026	954926	1000468	812127
PC_D205_W	88202408	84738577	0.960729	88202408	44101204	44101204	82135460	0.931216	357953	210300	158224
PC_D209_W	69532070	67421770	0.96965	69532070	34766035	34766035	65621694	0.943762	280692	118752	84400
PC_D217_W	60366506	57325688	0.949627	60366506	30183253	30183253	55632346	0.921576	376748	90998	60153
PC_D221_W	65600514	63249974	0.964169	65600514	32800257	32800257	61598090	0.938988	314858	113700	79683
PC_D225_W	60402236	58265310	0.964622	60402236	30201118	30201118	56615700	0.937311	239452	116360	83689
PC_D23_W	67565116	65002855	0.962077	67565116	33782558	33782558	63143304	0.934555	260291	136650	100682
PC_D237_W	75857676	72805002	0.959758	75857676	37928838	37928838	70652390	0.931381	303328	173020	131260
PC_D245_W	76011746	72901018	0.959076	76011746	38005873	38005873	70832496	0.931863	283006	189590	148577
PC_D249_W	75934446	72278717	0.951857	75934446	37967223	37967223	70252116	0.925168	283173	153410	112186
PC_D253_W	75195236	72310409	0.961636	75195236	37597618	37597618	70100134	0.932242	266865	219882	176174
PC_D265_L2	61302668	58478449	0.95393	61302668	30651334	30651334	56705338	0.925006	251955	197414	160421
PC_D269_W	83606776	79784113	0.954278	83606776	41803388	41803388	77578424	0.927896	352797	270280	214666
PC_D273_W	53532682	51781035	0.967279	53532682	26766341	26766341	50064292	0.93521	236081	223048	183452
PC_D277_L	77177570	74143883	0.960692	77177570	38588785	38588785	72278912	0.936527	279731	166440	126922
PC_D289_W	72940386	70218075	0.962678	72940386	36470193	36470193	68245340	0.935632	286621	178136	138346
PC_D29_W2	62576346	60524429	0.967209	62576346	31288173	31288173	58703650	0.938112	248953	243716	202867
PC_D297_L2	83683776	80602762	0.963183	83683776	41841888	41841888	78583218	0.93905	313080	119028	80151
PC_D305_W	75173392	72236743	0.960935	75173392	37586696	37586696	70000970	0.931193	322819	333022	278796
PC_D309_W	78368500	75772164	0.96687	78368500	39184250	39184250	73461394	0.937384	335086	259734	209967
PC_D313_S	79352840	76529606	0.964422	79352840	39676420	39676420	74451698	0.938236	273652	199946	153326
PC_D317_W	74922570	72315956	0.965209	74922570	37461285	37461285	70052734	0.935002	320806	275808	224947
PC_D317_W2	67585228	65184898	0.964484	67585228	33792614	33792614	63302514	0.936632	260970	121522	86007
PC_D321_W	68811848	66600911	0.96787	68811848	34405924	34405924	64605834	0.938877	302285	345744	293338
PC_D325_W	78040256	75513357	0.967621	78040256	39020128	39020128	73218352	0.938213	361065	369406	308776
PC_D325_W2	61317658	59482770	0.970076	61317658	30658829	30658829	57833832	0.943184	220116	101446	69260
PC_D33_W	89622792	87214157	0.973125	89622792	44811396	44811396	84617058	0.944147	358005	399024	336419
PC_D333_L2	71494194	68529093	0.958527	71494194	35747097	35747097	66588664	0.931386	324957	97086	63659
PC_D337_W	59903770	58010194	0.96839	59903770	29951885	29951885	56179098	0.937822	285464	261772	217447
PC_D337_W2	65489454	63222486	0.965384	65489454	32744727	32744727	61299602	0.936022	315094	271086	223898
PC_D341_L	80103310	77466898	0.967087	80103310	40051655	40051655	75270142	0.939663	357664	290132	234242
PC_D349_W2	73831196	71752617	0.971847	73831196	36915598	36915598	69617726	0.942931	304675	272228	223434
PC_D357_W2	90956862	88186297	0.96954	90956862	45478431	45478431	85374094	0.938622	397989	378834	314465
PC_D369_L	71512728	69255344	0.968434	71512728	35756364	35756364	67165186	0.939206	296362	169844	127760
PC_D37_W	84347376	81804070	0.969847	84347376	42173688	42173688	79387482	0.941197	385692	322500	265518
PC_D373_W	63309582	61526847	0.971841	63309582	31654791	31654791	59555408	0.940701	275317	304116	257961
PC_D377_L	78061252	75746618	0.970348	78061252	39030626	39030626	73551592	0.942229	313300	207122	160011
PC_D381_L	73516216	70870929	0.964018	73516216	36758108	36758108	68688288	0.934328	329125	259686	213357
PC_D385_W	75238286	72756098	0.967009	75238286	37619143	37619143	70532012	0.937448	311478	168282	124422
PC_D393_W	86329166	83514635	0.967398	86329166	43164583	43164583	80840216	0.936418	312283	319464	265350
PC_D397_W2	105189814	101561872	0.965511	105189814	52594907	52594907	98495842	0.936363	389818	243930	184017
PC_D401_L	60442348	58345528	0.965309	60442348	30221174	30221174	56698332	0.938056	196336	119914	88408
PC_D405_L	74837254	72491121	0.96865	74837254	37418627	37418627	70202618	0.93807	276295	235156	185363
PC_D409_L	107572484	104174631	0.968413	107572484	53786242	53786242	101399382	0.942614	410521	236054	175347
PC_D41_W	74399154	71912896	0.966582	74399154	37199577	37199577	69936092	0.940012	247720	164328	124451
PC_D413_W	69635528	67417886	0.968154	69635528	34817764	34817764	65335848	0.938255	257470	138848	100040
PC_D417_W	55923898	52751700	0.943277	55923898	27961949	27961949	51240576	0.916255	200442	97394	67921
PC_D49_L	72195734	68617855	0.950442	72195734	36097867	36097867	66947520	0.927306	301357	76588	44220
PC_D69_W	79674298	76229248	0.956761	79674298	39837149	39837149	73981668	0.928551	320736	141852	99958
PC_D77_L	64931624	62058982	0.955759	64931624	32465812	32465812	60346742	0.929389	249522	119204	84571
PC_D81_L	69282658	66215074	0.955724	69282658	34641329	34641329	64415028	0.929742	269992	80096	48325
PC_D85_W	70497198	67921940	0.96347	70497198	35248599	35248599	66012908	0.936391	250446	158374	118489
PC_D89_L	62014088	60132554	0.96966	62014088	31007044	31007044	58335794	0.940686	259740	182034	141597
PC_D9_L1	90715284	87787320	0.967724	90715284	45357642	45357642	85188120	0.939071	358098	186384	136880
PC_D97_W	81013822	77206682	0.953006	81013822	40506911	40506911	75268394	0.929081	295330	100278	67050

## Sheet: Table S2
Table S2. Seqencing summary of 112 validation samples
sample	total reads	mapped reads	mapping rate	paired reads	read1	read2	properly paired reads	paired ratio	singletons	mate mapped to a different chr	mate mapped to a different chr (mapQ>=5)
BPH_H106_W	70027162	67244776	0.960267	70027162	35013581	35013581	65306336	0.932586	66878052	81808	31736
BPH_H112_X	69058344	66812563	0.96748	69058344	34529172	34529172	64550776	0.934728	66451088	109146	55148
BPH_H116_W	56286324	54713640	0.972059	56286324	28143162	28143162	52959040	0.940886	54409446	86776	40437
BPH_H117_W	71260474	69207476	0.97119	71260474	35630237	35630237	67003034	0.940255	68846980	96404	43298
BPH_H121_W	59633952	57679913	0.967233	59633952	29816976	29816976	55648886	0.933175	57367714	121720	72114
BPH_H123_X	66995182	64966604	0.969721	66995182	33497591	33497591	62831392	0.937849	64627558	89128	41357
BPH_H57_W	67121446	64997549	0.968357	67121446	33560723	33560723	63043916	0.939251	64615078	137948	81187
BPH_H59_W	65186112	63197424	0.969492	65186112	32593056	32593056	60840880	0.933341	62796026	169566	101518
BPH_H66_W2	82245312	80006805	0.972783	82245312	41122656	41122656	77297164	0.939837	79550578	205892	133541
BPH_H90_W2	73480184	71398191	0.971666	73480184	36740092	36740092	68472396	0.931848	70938890	200044	119135
M144_W	62889504	61089350	0.971376	62889504	31444752	31444752	59196814	0.941283	60656828	101956	40032
M154_W	69615582	67344600	0.967378	69615582	34807791	34807791	65171544	0.936163	66825514	239232	159510
M157_X	52826342	50948492	0.964452	52826342	26413171	26413171	49363410	0.934447	50583204	85530	36290
M158_X	67870798	65823188	0.969831	67870798	33935399	33935399	63716080	0.938785	65349506	129630	62677
M159_W	56934536	55117916	0.968093	56934536	28467268	28467268	53327908	0.936653	54701308	117746	55601
M160_W	10923814	10304938	0.943346	10923814	5461907	5461907	9657208	0.884051	10154838	43192	21184
M168_X	62786666	60812035	0.96855	62786666	31393333	31393333	58882176	0.937813	60359520	124172	56788
M169_X	71662716	69574346	0.970858	71662716	35831358	35831358	67501010	0.941926	69088616	132350	62905
M69_W	75580592	73065598	0.966724	75580592	37790296	37790296	70634602	0.93456	72541174	174650	95315
M70_W	66937042	64838388	0.968647	66937042	33468521	33468521	62692194	0.936584	64366890	181524	111678
PC_K14_L	81149878	77922925	0.960235	81149878	40574939	40574939	75880390	0.935065	77584304	119050	72726
PC_K18_W	118363280	115173880	0.973054	118363280	59181640	59181640	112291296	0.9487	114624996	139616	70410
PC_K19_W	56156092	54563007	0.971631	56156092	28078046	28078046	52891290	0.941862	54314548	49606	20380
PC_K21_X	42948806	41751961	0.972133	42948806	21474403	21474403	40614950	0.94566	41564706	32520	12892
PC_K24_W	35484600	34499546	0.97224	35484600	17742398	17742202	28578620	0.805381	34446584	83016	18765
PC_K28_W	71322972	69465734	0.97396	71322972	35661486	35661486	67759204	0.950033	69142642	170818	127495
PC_K29_W	52202604	50636223	0.969994	52202604	26101302	26101302	49095188	0.940474	50404256	93260	65926
PC_K3_L	68019478	65887683	0.968659	68019478	34009739	34009739	64231932	0.944317	65581002	93638	54972
PC_K33_W	47734828	46473261	0.973571	47734828	23867414	23867414	45223514	0.94739	46268626	39526	18073
PC_K37_X	48173984	46653091	0.968429	48173984	24086992	24086992	45344670	0.941269	46442102	46774	23330
PC_K39_W	48961000	47129986	0.962603	48961000	24480500	24480500	45793566	0.935307	46920452	59328	36490
PC_K41_W	46408952	45044836	0.970607	46408952	23204476	23204476	43731580	0.942309	44840134	73568	48634
PC_K42_L	74631834	71604685	0.959439	74631834	37315917	37315917	69782960	0.935029	71272358	84652	44637
PC_K43_L	128176464	123902416	0.966655	128176464	64088232	64088232	120665296	0.9414	123371708	210836	140432
PC_K5_L	92600396	89744681	0.969161	92600396	46300198	46300198	87331212	0.943098	89271002	151272	87596
PC_L29_W	142351372	137679282	0.967179	142351372	71175686	71175686	134012920	0.941423	137064680	198496	117874
PC_L40_L	68179482	66304672	0.972502	68179482	34089741	34089741	64200108	0.941634	65967970	299704	244279
PC_L41_X	57739694	56227958	0.973818	57739694	28869847	28869847	54799606	0.94908	55953514	87582	55627
PC_L42_L	135617848	130597420	0.962981	135617848	67808924	67808924	126808056	0.93504	129988792	189000	108220
PC_L44_L	87472134	84547516	0.966565	87472134	43736067	43736067	81993186	0.937364	84191346	86204	42986
QN113	18730640	18264380	0.975107	18730640	9365320	9365320	17184354	0.917446	106910	235112	205854
QN64	21907866	21242506	0.969629	21907866	10953933	10953933	19651494	0.897006	181312	672976	615726
QP16	30292704	29396736	0.970423	30292704	15146352	15146352	27943458	0.922448	197548	350122	307094
QP23	28455960	27626195	0.97084	28455960	14227980	14227980	26450662	0.92953	174287	90292	62942
QP24	33253404	32312325	0.9717	33253404	16626702	16626702	30967976	0.931272	213625	314726	274001
QP26	25019958	24334777	0.972615	25019958	12509979	12509979	22284834	0.890682	192347	552892	493554
QP29	26906342	26148191	0.971823	26906342	13453171	13453171	23861084	0.88682	240953	764044	690943
QP35	24024250	23300092	0.969857	24024250	12012125	12012125	21226136	0.88353	217974	651888	585654
QP39	29948754	29075958	0.970857	29948754	14974377	14974377	27732458	0.925997	186518	298014	258057
QP40	22530622	21801752	0.96765	22530622	11265311	11265311	20051242	0.889955	191402	145462	102847
QP41	32379400	31351720	0.968261	32379400	16189700	16189700	29850246	0.92189	237346	278164	235204
QP42	38598214	37507729	0.971748	38598214	19299107	19299107	35860906	0.929082	249735	396132	348454
QP43	33191122	32165384	0.969096	33191122	16595561	16595561	30245630	0.911257	226890	274374	222811
QP44	29636074	28683876	0.96787	29636074	14818037	14818037	27347674	0.922783	185208	223746	189166
QP45	24393716	23691557	0.971216	24393716	12196858	12196858	21839582	0.895295	162843	406226	357494
QP47	26661976	25894856	0.971228	26661976	13330988	13330988	24050428	0.90205	217162	767684	702414
QP48	24879460	24153469	0.97082	24879460	12439730	12439730	22366772	0.899006	168813	332640	286366
QP50	25767414	24979351	0.969416	25767414	12883707	12883707	22894490	0.888506	203753	441726	385291
QP51	26707700	25977977	0.972677	26707700	13353850	13353850	24165252	0.904805	167169	457128	407897
QPN120	30684698	29839755	0.972464	30684698	15342349	15342349	28321558	0.922986	206219	273806	231428
QPN124	21848498	21251246	0.972664	21848498	10924249	10924249	19720790	0.902615	165296	503094	453619
QPN127	24174244	23538375	0.973696	24174244	12087122	12087122	22169626	0.917076	149485	401034	359572
QPN129	37529962	36567055	0.974343	37529962	18764981	18764981	34702602	0.924664	232663	436146	382674
QPN130	21843178	21267645	0.973652	21843178	10921589	10921589	19699704	0.90187	152159	326226	283353
QPN141	31922836	30899936	0.967957	31922836	15961418	15961418	29414364	0.921421	272082	411398	352160
QPN150	21719546	21201125	0.976131	21719546	10859773	10859773	20048378	0.923057	117243	311482	278395
QPN159	20450522	19864849	0.971361	20450522	10225261	10225261	18630234	0.910991	132391	302494	266092
QPN191	31086304	30155197	0.970048	31086304	15543152	15543152	28935570	0.930814	218845	264962	225282
QPN201	31351260	30489141	0.972501	31351260	15675630	15675630	29369176	0.936778	161573	275338	243775
QPN203	22754316	22125225	0.972353	22754316	11377158	11377158	20928138	0.919744	133881	301594	265768
QPN31	35330016	34270114	0.97	35330016	17665008	17665008	32242966	0.912622	324406	746804	663978
QPN75	33133740	32145541	0.970175	33133740	16566870	16566870	30684378	0.926077	224967	248254	207814
QN120	54709090	53203660	0.972483	54709090	27354545	27354545	50807102	0.928678	350550	605752	532717
QN58	47821316	46470094	0.971744	47821316	23910658	23910658	44350890	0.927429	304506	431952	372274
QN65	47559540	46187573	0.971153	47559540	23779770	23779770	42593334	0.895579	381847	354188	270170
QPN113	59871092	58170828	0.971601	59871092	29935546	29935546	55385654	0.925082	368410	570962	493299
QPN2	55547940	54004868	0.972221	55547940	27773970	27773970	50879036	0.915948	371526	658200	572369
QPN3	58695930	56927738	0.969875	58695930	29347965	29347965	54190140	0.923235	384682	397808	326579
QN109	52323592	50908688	0.972959	52323592	26161796	26161796	48540526	0.927699	315836	295866	240102
QPN199	58836496	56980564	0.968456	58836496	29418248	29418248	54784498	0.931131	333362	241888	188505
QPN38	60578136	58881109	0.971986	60578136	30289068	30289068	56218606	0.928035	345727	381484	316108
QPN80	49794320	48324738	0.970487	49794320	24897160	24897160	46018724	0.924176	300438	185876	135136
QPN84	60495498	58840453	0.972642	60495498	30247749	30247749	56382982	0.932019	321339	344520	287641
QPN93	62910406	61154497	0.972089	62910406	31455203	31455203	57846660	0.919509	417169	302480	225110
QN101	28730656	27924036	0.971925	28730656	14365328	14365328	26814026	0.93329	165236	293952	260592
QN74	24851788	24182589	0.973072	24851788	12425894	12425894	22860624	0.919878	154513	252646	217496
QPN118	25457724	24690242	0.969853	25457724	12728862	12728862	22685112	0.89109	219718	437702	380153
QPN152	28213420	27397241	0.971071	28213420	14106710	14106710	25849964	0.916229	175923	307262	266987
QPN189	26716392	25894150	0.969223	26716392	13358196	13358196	24226332	0.906797	197964	572854	519172
QPN210	26754540	25981091	0.971091	26754540	13377270	13377270	24533354	0.916979	175673	284914	244750
QPN225	35196154	34256582	0.973305	35196154	17598077	17598077	32624442	0.926932	181758	376036	334890
QN78	23806948	23096729	0.970168	23806948	11903474	11903474	21517374	0.903827	189529	191270	152893
QN79	21129532	20452633	0.967964	21129532	10564766	10564766	19340430	0.915327	198261	139752	111362
QPN133	28132086	27358066	0.972486	28132086	14066043	14066043	25896680	0.920539	202668	192416	159102
QPN176	21219082	20511647	0.96666	21219082	10609541	10609541	19320406	0.91052	176887	143102	114193
QPN200	29168078	28322762	0.971019	29168078	14584039	14584039	26959386	0.924277	208232	201944	169040
QPN204	26407400	25548812	0.967487	26407400	13203700	13203700	24379972	0.923225	205978	136910	107752
QPN220	22553378	21856407	0.969097	22553378	11276689	11276689	20517100	0.909713	220663	144754	111085
QN112	26643920	25820048	0.969078	26643920	13321960	13321960	24529122	0.920627	142402	289590	253436
QN117	21530426	20196687	0.938053	21530426	10765213	10765213	19091108	0.886704	119051	180526	153631
QPN11	23858236	23169164	0.971118	23858236	11929118	11929118	21935450	0.919408	135978	324862	287408
QPN14	22041354	21353925	0.968812	22041354	11020677	11020677	20250050	0.91873	120947	188762	160336
QPN190	28830236	27941691	0.96918	28830236	14415118	14415118	26555236	0.92109	153495	249146	212300
QPN230	23031130	22347546	0.970319	23031130	11515565	11515565	21057756	0.914317	138282	366696	326276
QPN264	21088938	20415292	0.968057	21088938	10544469	10544469	19255206	0.913048	128070	210310	179979
QPN346	21376068	20708403	0.968766	21376068	10688034	10688034	19596178	0.916734	120229	200476	169960
QN152	22632240	21989288	0.971591	22632240	11316120	11316120	20961486	0.926178	159578	295690	263483
QN154	25767452	24915054	0.96692	25767452	12883726	12883726	23211048	0.900789	277996	675032	601471
QN48	16379308	15916623	0.971752	16379308	8189654	8189654	15132526	0.923881	101675	163216	142048
QN62	25112548	24419285	0.972394	25112548	12556274	12556274	23062634	0.918371	199841	429564	380803
QPN160	27303638	25956277	0.950653	27303638	13651819	13651819	24710686	0.905033	165679	326582	289822
QPN258	27818950	27065507	0.972916	27818950	13909475	13909475	25628444	0.921258	183883	347252	306784

## Sheet: Table S3
Table S3. Seqencing summary of 20 mHSPC samples
sample	total reads	mapped reads	mapping rate	paired reads	read1	read2	properly paired reads	paired ratio	singletons	mate mapped to a different chr	mate mapped to a different chr (mapQ>=5)
PC_D153_L	87316328	81713304	0.935831	87316328	43658164	43658164	79316440	0.90838	81364724	140310	93826
PC_D189_L	105394888	99916662	0.948022	105394888	52697444	52697444	95701322	0.908026	98961736	1000468	812127
PC_D201_W2	60366506	57325688	0.949627	60366506	30183253	30183253	55632346	0.921576	56948940	90998	60153
PC_D233_W	75195236	72310409	0.961636	75195236	37597618	37597618	70100134	0.932242	72043544	219882	176174
PC_D257_L	72940386	70218075	0.962678	72940386	36470193	36470193	68245340	0.935632	69931454	178136	138346
PC_D261_W	62576346	60524429	0.967209	62576346	31288173	31288173	58703650	0.938112	60275476	243716	202867
PC_D281_L	74922570	72315956	0.965209	74922570	37461285	37461285	70052734	0.935002	71995150	275808	224947
PC_D281_L2	67585228	65184898	0.964484	67585228	33792614	33792614	63302514	0.936632	64923928	121522	86007
PC_D285_W	68811848	66600911	0.96787	68811848	34405924	34405924	64605834	0.938877	66298626	345744	293338
PC_D293_W	89622792	87214157	0.973125	89622792	44811396	44811396	84617058	0.944147	86856152	399024	336419
PC_D301_W	59903770	58010194	0.96839	59903770	29951885	29951885	56179098	0.937822	57724730	261772	217447
PC_D345_L	74837254	72491121	0.96865	74837254	37418627	37418627	70202618	0.93807	72214826	235156	185363
PC_D353_L	74399154	71912896	0.966582	74399154	37199577	37199577	69936092	0.940012	71665176	164328	124451
PC_D361_L	55923898	52751700	0.943277	55923898	27961949	27961949	51240576	0.916255	52551258	97394	67921
PC_D365_W	72195734	68617855	0.950442	72195734	36097867	36097867	66947520	0.927306	68316498	76588	44220
PC_D389_L	81013822	77206682	0.953006	81013822	40506911	40506911	75268394	0.929081	76911352	100278	67050
PC_D5_L	55885166	53848760	0.963561	55885166	27942583	27942583	52305264	0.935942	53643728	130778	97792
PC_D61_W	69597532	67338940	0.967548	69597532	34798766	34798766	65399928	0.939687	67082652	149686	111868
PC_D65_W	63466984	61708647	0.972295	63466984	31733492	31733492	59969088	0.944886	61460824	221390	179580
PC_Z634_L	259441266	253662965	0.977728	259441266	129720633	129720633	242826614	0.93596	252886604	1402090	1203834

## Sheet: Table S4
Table S4. Patients clinical summary of 177 training samples.
IP_name	Group	PSA	Age	GS	Pathology.T	Pathology.N	Pathology.M
BPH_H11_L	BiopsyNegative	5.06	62	NA	NA	NA	NA
BPH_H12_L	BiopsyNegative	14.83	64	NA	NA	NA	NA
BPH_H15_W	BiopsyNegative	27.59	68	NA	NA	NA	NA
BPH_H16_W	BiopsyNegative	10.1	58	NA	NA	NA	NA
BPH_H17_L	BiopsyNegative	9.31	75	NA	NA	NA	NA
BPH_H18_L	BiopsyNegative	4.954	64	NA	NA	NA	NA
BPH_H19_L	BiopsyNegative	14.663	63	NA	NA	NA	NA
BPH_H2_W	BiopsyNegative	6.8	63	NA	NA	NA	NA
BPH_H20_S	BiopsyNegative	8.79	75	NA	NA	NA	NA
BPH_H21_S	BiopsyNegative	8.01	63	NA	NA	NA	NA
BPH_H22_L	BiopsyNegative	0.34	54	NA	NA	NA	NA
BPH_H24_W	BiopsyNegative	11.684	47	NA	NA	NA	NA
BPH_H25_W	BiopsyNegative	9.46	71	NA	NA	NA	NA
BPH_H27_L	BiopsyNegative	14.122	70	NA	NA	NA	NA
BPH_H29_L	BiopsyNegative	NA	63	NA	NA	NA	NA
BPH_H30_W	BiopsyNegative	8.589	63	NA	NA	NA	NA
BPH_H31_W	BiopsyNegative	12.39	62	NA	NA	NA	NA
BPH_H32_W	BiopsyNegative	5.51	58	NA	NA	NA	NA
BPH_H33_W	BiopsyNegative	21.527	72	NA	NA	NA	NA
BPH_H37_L	BiopsyNegative	8.52	67	NA	NA	NA	NA
BPH_H39_L	BiopsyNegative	7.945	71	NA	NA	NA	NA
BPH_H40_W	BiopsyNegative	7.368	65	NA	NA	NA	NA
BPH_H42_W	BiopsyNegative	14.4	59	NA	NA	NA	NA
BPH_H43_W	BiopsyNegative	4.418	75	NA	NA	NA	NA
BPH_H44_W	BiopsyNegative	8.56	65	NA	NA	NA	NA
BPH_H61_L	BiopsyNegative	20	70	NA	NA	NA	NA
BPH_H64_L	BiopsyNegative	8.5	62	NA	NA	NA	NA
BPH_H66_L	BiopsyNegative	9.787	65	NA	NA	NA	NA
BPH_H67_W	BiopsyNegative	6.7	74	NA	NA	NA	NA
BPH_H69_W	BiopsyNegative	12.235	75	NA	NA	NA	NA
BPH_H70_W	BiopsyNegative	5.79	65	NA	NA	NA	NA
BPH_H71_L	BiopsyNegative	10.6	74	NA	NA	NA	NA
BPH_H72_L	BiopsyNegative	10.377	72	NA	NA	NA	NA
BPH_H74_W	BiopsyNegative	12.9	65	NA	NA	NA	NA
BPH_H77_W	BiopsyNegative	18.17	72	NA	NA	NA	NA
BPH_H78_W	BiopsyNegative	12.34	71	NA	NA	NA	NA
BPH_H80_L	BiopsyNegative	8.603	65	NA	NA	NA	NA
BPH_H81_L	BiopsyNegative	13.98	76	NA	NA	NA	NA
BPH_H82_L	BiopsyNegative	9.06	64	NA	NA	NA	NA
BPH_H83_W	BiopsyNegative	7.67	72	NA	NA	NA	NA
BPH_H85_W	BiopsyNegative	4.46	67	NA	NA	NA	NA
BPH_H87_L	BiopsyNegative	7.366	75	NA	NA	NA	NA
BPH_H88_W	BiopsyNegative	5.166	65	NA	NA	NA	NA
BPH_H89_L	BiopsyNegative	6.554	65	NA	NA	NA	NA
BPH_H90_W2	BiopsyNegative	8.752	73	NA	NA	NA	NA
BPH_H91_W	BiopsyNegative	7.67	58	NA	NA	NA	NA
BPH_H92_W	BiopsyNegative	10.4	58	NA	NA	NA	NA
BPH_H96_W	BiopsyNegative	15.63	68	NA	NA	NA	NA
BPH_H97_W	BiopsyNegative	8.97	68	NA	NA	NA	NA
H1_W	Healthy	NA	62	NA	NA	NA	NA
H3_W	Healthy	NA	74	NA	NA	NA	NA
H4_W	Healthy	NA	53	NA	NA	NA	NA
H45_W	Healthy	NA	NA	NA	NA	NA	NA
H47_L	Healthy	NA	NA	NA	NA	NA	NA
H5_L	Healthy	0.574	70	NA	NA	NA	NA
H6_L	Healthy	NA	NA	NA	NA	NA	NA
M10_L	Healthy	1.48	65	NA	NA	NA	NA
M100_L	Healthy	0.89	65	NA	NA	NA	NA
M11_W	Healthy	0.78	46	NA	NA	NA	NA
M114_W	Healthy	3.65	74	NA	NA	NA	NA
M115_W	Healthy	3.46	73	NA	NA	NA	NA
M117_W	Healthy	2.12	76	NA	NA	NA	NA
M12_W	Healthy	0.55	83	NA	NA	NA	NA
M120_W	Healthy	0.77	71	NA	NA	NA	NA
M122_W	Healthy	2.08	75	NA	NA	NA	NA
M123_L	Healthy	0.56	74	NA	NA	NA	NA
M128_W2	Healthy	2.7	84	NA	NA	NA	NA
M13_W	Healthy	0.94	50	NA	NA	NA	NA
M14_L	Healthy	0.56	55	NA	NA	NA	NA
M16_L	Healthy	0.56	54	NA	NA	NA	NA
M19_L	Healthy	1.28	68	NA	NA	NA	NA
M20_L	Healthy	1.12	68	NA	NA	NA	NA
M23_W	Healthy	1.53	66	NA	NA	NA	NA
M24_W	Healthy	0.44	53	NA	NA	NA	NA
M26_W	Healthy	0.75	66	NA	NA	NA	NA
M27_W	Healthy	2.38	72	NA	NA	NA	NA
M3_L1	Healthy	0.6	62	NA	NA	NA	NA
M34_W	Healthy	1.03	66	NA	NA	NA	NA
M35_L	Healthy	1.23	60	NA	NA	NA	NA
M36_L1	Healthy	0.53	63	NA	NA	NA	NA
M37_W	Healthy	1.6	60	NA	NA	NA	NA
M4_L	Healthy	0.74	57	NA	NA	NA	NA
M40_W	Healthy	0.17	57	NA	NA	NA	NA
M41_L	Healthy	0.82	59	NA	NA	NA	NA
M44_L	Healthy	0.34	63	NA	NA	NA	NA
M45_L	Healthy	1.11	64	NA	NA	NA	NA
M47_W	Healthy	2.18	68	NA	NA	NA	NA
M5_S	Healthy	0.81	53	NA	NA	NA	NA
M56_W	Healthy	0.99	69	NA	NA	NA	NA
M59_W	Healthy	3.36	76	NA	NA	NA	NA
M6_S	Healthy	0.77	66	NA	NA	NA	NA
M61_L	Healthy	1.87	66	NA	NA	NA	NA
M65_L	Healthy	0.39	51	NA	NA	NA	NA
M7_L	Healthy	0.83	55	NA	NA	NA	NA
M8_L	Healthy	1.23	55	NA	NA	NA	NA
M81_W	Healthy	0.97	78	NA	NA	NA	NA
M82_W	Healthy	1.28	74	NA	NA	NA	NA
M9_W	Healthy	1.24	64	NA	NA	NA	NA
M99_L	Healthy	2.29	68	NA	NA	NA	NA
PC_D1_L	locally_advanced	1270.14	60	9	T3b	N1	M0
PC_D101_L	locally_advanced	8.995	72	7	T3a	N0	M0
PC_D105_W	locally_advanced	14.224	62	8	T3a	N0	M0
PC_D109_L	locally_advanced	78.128	68	8	T3b	N0	NA
PC_D113_L	locally_advanced	17.5	66	8	T3a	N0	M0
PC_D117_W	localized	18.716	74	7	T2	N0	M0
PC_D121_L	locally_advanced	25.348	74	9	T3b	N0	NA
PC_D125_L	localized	11.5	72	6	T2	N0	NA
PC_D129_L	locally_advanced	285.9	69	8	T3b	N1
PC_D137_W	localized	23.39	65	7	T2	N0	NA
PC_D149_L	localized	28.487	62	8	T2	N0	NA
PC_D149_L	localized	28.487	62	8	T2	N0	NA
PC_D161_L	locally_advanced	11.29	65	7	T3a	NA	NA
PC_D161_L2	locally_advanced	11.29	65	7	T3a	NA	NA
PC_D169_L	locally_advanced	16.02	68	7	T3a	N0	NA
PC_D169_L2	locally_advanced	16.02	68	7	T3a	N0	NA
PC_D17_W	locally_advanced	19.3	61	8	T3a	N0	NA
PC_D173_W	localized	14.536	74	7	T2	N0	NA
PC_D177_W	locally_advanced	100	78	9	T3a	N0	M0
PC_D177_W2	locally_advanced	100	78	9	T3a	N0	M0
PC_D181_L	locally_advanced	77.705	63	7	T3a	N0	NA
PC_D185_L	locally_advanced	26.85	69	7	T3a	N0	M0
PC_D193_L	locally_advanced	7.93	73	7	T3a	N0	NA
PC_D197_W2	localized	15.64	74	7	T2	NA	NA
PC_D205_W	locally_advanced	38.03	67	9	T3b	N0	NA
PC_D209_W	localized	8.29	65	7	T2	NA	NA
PC_D217_W	locally_advanced	12.56	68	7	T3a	N0	M0
PC_D221_W	locally_advanced	7.6	74	7	T3a	N0	M0
PC_D225_W	localized	13.21	69	7	T2	N0	NA
PC_D23_W	locally_advanced	6.75	66	7	T3a	N0	M0
PC_D237_W	locally_advanced	11.428	79	7	T3b	N0	M0
PC_D245_W	localized	10.735	70	8	T2	N0	M0
PC_D249_W	localized	5.473	64	7	T2	N0	M0
PC_D253_W	localized	8.01	66	7	T2	N0	M0
PC_D265_L2	locally_advanced	32.255	71	9	T3b	N0	M0
PC_D269_W	locally_advanced	23.46	69	9	T3a	N0	NA
PC_D273_W	locally_advanced	100	79	9	T3b	N1	NA
PC_D277_L	locally_advanced	11.36	67	8	T3a	N0	M0
PC_D289_W	locally_advanced	10.98	71	7	T3a	N0	M0
PC_D29_W2	locally_advanced	20.58	80	7	T3b	NA	NA
PC_D297_L2	localized	19.409	74	7	T2	N0	M0
PC_D305_W	localized	8.718	64	7	T2	NA	NA
PC_D309_W	localized	8.42	68	6	T2	N0	M0
PC_D313_S	localized	13.717	69	7	T2	N0	M0
PC_D317_W	locally_advanced	14.2	70	7	T3a	NA	NA
PC_D317_W2	locally_advanced	14.2	70	7	T3a	NA	NA
PC_D321_W	localized	12.56	78	7	T2	N0	M0
PC_D325_W	localized	51.64	78	9	T2	N0	NA
PC_D325_W2	localized	51.64	78	9	T2	N0	NA
PC_D33_W	localized	13.843	72	7	T2	NA	NA
PC_D333_L2	localized	21.78	70	7	T2	N0	M0
PC_D337_W	localized	10.53	78	7	T2	NA	NA
PC_D337_W2	localized	10.53	78	7	T2	NA	NA
PC_D341_L	localized	10.515	62	7	T2	N0	M0
PC_D349_W2	localized	13.284	70	7	T2	N0	M0
PC_D357_W2	locally_advanced	24.7	75	7	T3a	NA	NA
PC_D369_L	localized	34.56	78	7	T2	N0	NA
PC_D37_W	localized	10.046	69	7	T2	N0	M0
PC_D373_W	locally_advanced	10.3	64	7	T3a	N0	M0
PC_D377_L	locally_advanced	13	76	9	T3a	N0	NA
PC_D381_L	locally_advanced	27.507	79	7	T3b	N1	M0
PC_D385_W	locally_advanced	5.44	67	7	T3a	NA	M0
PC_D393_W	locally_advanced	10	63	7	T3a	NA	NA
PC_D397_W2	locally_advanced	18.51	77	7	T3a	N0	M0
PC_D401_L	locally_advanced	149	78	9	T3b	N0	M0
PC_D405_L	locally_advanced	21.752	68	7	T2	N1	NA
PC_D409_L	localized	1.86	60	8	T2	NA	NA
PC_D41_W	localized	14.8	66	6	T2	NA	NA
PC_D413_W	localized	69.94	68	7	T2	NA	NA
PC_D417_W	locally_advanced	100	64	7	T3b	N1	NA
PC_D49_L	locally_advanced	14.86	64	7	T2	N1	M0
PC_D69_W	localized	8.2	68	7	T2	N0	M0
PC_D77_L	locally_advanced	33.217	58	7	T3b	N0	M0
PC_D81_L	localized	7.31	64	7	T2	N0	M0
PC_D85_W	localized	6.637	67	6	T2	NA	NA
PC_D89_L	locally_advanced	6.75	61	9	T3a	N0	NA
PC_D9_L1	locally_advanced	37.93	74	7	T3a	N0	M0
PC_D97_W	locally_advanced	34.41	72	9	T3a	N0	NA

## Sheet: Table S5
Table S5. Patients clinical summary of 112 validation samples.
Sample	Group	PSA	Age	GS	Pathology.T	Pathology.N	Pathology.M
BPH_H106_W	BiopsyNegative	9.162	53	NA	NA	NA	NA
BPH_H112_X	BiopsyNegative	4.08	52	NA	NA	NA	NA
BPH_H116_W	BiopsyNegative	11.8	74	NA	NA	NA	NA
BPH_H117_W	BiopsyNegative	6.44	62	NA	NA	NA	NA
BPH_H121_W	BiopsyNegative	7.338	66	NA	NA	NA	NA
BPH_H123_X	BiopsyNegative	6.181	69	NA	NA	NA	NA
BPH_H57_W	BiopsyNegative	9.285	57	NA	NA	NA	NA
BPH_H59_W	BiopsyNegative	4.29	57	NA	NA	NA	NA
BPH_H66_W2	BiopsyNegative	9.787	65	NA	NA	NA	NA
BPH_H90_W2	BiopsyNegative	8.752	73	NA	NA	NA	NA
M144_W	Healthy	1.1	65	NA	NA	NA	NA
M154_W	Healthy	0.51	67	NA	NA	NA	NA
M157_X	Healthy	0.53	59	NA	NA	NA	NA
M158_X	Healthy	0.11	66	NA	NA	NA	NA
M159_W	Healthy	1.24	64	NA	NA	NA	NA
M160_W	Healthy	0.28	67	NA	NA	NA	NA
M168_X	Healthy	0.38	50	NA	NA	NA	NA
M169_X	Healthy	1.35	54	NA	NA	NA	NA
M69_W	Healthy	0.64	60	NA	NA	NA	NA
M70_W	Healthy	0.8	54	NA	NA	NA	NA
PC_K14_L	locally_advanced	11.69	73	9	T3a	NA	NA
PC_K18_W	locally_advanced	11.21	60	7	T3a	NA	NA
PC_K19_W	localized	23	70	7	NA	NA	NA
PC_K21_X	localized	52.81	75	7	T2	NA	NA
PC_K24_W	localized	10.13	65	7	T2	NA	NA
PC_K28_W	locally_advanced	28.53	73	9	T3a	N0	NA
PC_K29_W	localized	25.26	66	6	T2	N0	NA
PC_K3_L	locally_advanced	10.71	75	9	T3a	NA	NA
PC_K33_W	localized	21.54	66	7	T2	NA	NA
PC_K37_X	localized	5.72	69	7	T2	NA	NA
PC_K39_W	localized	6.165	63	9	T2	NA	NA
PC_K41_W	localized	11.738	76	7	T2	N0	NA
PC_K42_L	locally_advanced	41.88	67	7	T3a	N0	NA
PC_K43_L	locally_advanced	72.59	78	9	T3a	N0	NA
PC_K5_L	locally_advanced	4.98	78	7	T3b	NA	NA
PC_L29_W	locally_advanced	12.05	72	9	T3b	N0	NA
PC_L40_L	locally_advanced	4.37	61	7	T3c	NA	NA
PC_L41_X	localized	5.446	63	7	T2	NA	NA
PC_L42_L	locally_advanced	5.503	78	7	T3c	NA	NA
PC_L44_L	localized	8.04	68	7	T2	NA	NA
QN65	locally_advanced	8.08	71	NA	NA	NA	NA
QN120	locally_advanced	34.71	79	NA	NA	NA	NA
QN58	localized	16.86	68	NA	NA	NA	NA
QPN2	Healthy	1.98	70	NA	NA	NA	NA
QPN3	Healthy	1.29	53	NA	NA	NA	NA
QPN113	Healthy	0.91	63	NA	NA	NA	NA
QN109	locally_advanced	11.47	79	NA	NA	NA	NA
QPN38	localized	10.3	71	NA	NA	NA	NA
QPN93	localized	8.78	83	NA	NA	NA	NA
QPN80	BiopsyNegative	6.63	63	NA	NA	NA	NA
QPN84	BiopsyNegative	8.36	73	NA	NA	NA	NA
QPN199	BiopsyNegative	8.07	67	NA	NA	NA	NA
QN74	locally_advanced	8.47	84	NA	NA	NA	NA
QN101	localized	9.41	76	NA	NA	NA	NA
QPN189	localized	9.35	70	NA	NA	NA	NA
QPN210	localized	8.51	63	NA	NA	NA	NA
QPN118	Healthy	0.37	73	NA	NA	NA	NA
QPN152	Healthy	2.21	61	NA	NA	NA	NA
QPN225	BiopsyNegative	24.9	72	NA	NA	NA	NA
QPN200	locally_advanced	43.08	75	NA	NA	NA	NA
QN78	locally_advanced	4.357	61	NA	NA	NA	NA
QN79	locally_advanced	11.038	74	NA	NA	NA	NA
QPN220	localized	18.08	70	NA	NA	NA	NA
QPN133	Healthy	0.72	61	NA	NA	NA	NA
QPN176	Healthy	2.06	69	NA	NA	NA	NA
QPN204	BiopsyNegative	1.37	61	NA	NA	NA	NA
QPN264	locally_advanced	17.33	76	NA	NA	NA	NA
QPN11	locally_advanced	38.01	73	NA	NA	NA	NA
QPN230	localized	2.92	65	NA	NA	NA	NA
QPN346	Healthy	0.38	48	NA	NA	NA	NA
QN112	BiopsyNegative	5.442	55	NA	NA	NA	NA
QN117	BiopsyNegative	2.7	69	NA	NA	NA	NA
QPN190	BiopsyNegative	27.48	49	NA	NA	NA	NA
QPN14	BiopsyNegative	7.2	61	NA	NA	NA	NA
QN152	locally_advanced	8.94	78	NA	NA	NA	NA
QN62	localized	5.54	71	NA	NA	NA	NA
QPN258	localized	10.12	73	NA	NA	NA	NA
QPN160	Healthy	0.67	63	NA	NA	NA	NA
QN48	Healthy	0.3	51	NA	NA	NA	NA
QN154	BiopsyNegative	34.28	75	NA	NA	NA	NA
QP16	locally_advanced		62	NA	NA	NA	NA
QP23	locally_advanced		66	NA	NA	NA	NA
QP24	locally_advanced		60	NA	NA	NA	NA
QP39	localized		71	NA	NA	NA	NA
QP40	localized			NA	NA	NA	NA
QP41	localized		59	NA	NA	NA	NA
QP42	localized		67	NA	NA	NA	NA
QP43	localized		72	NA	NA	NA	NA
QP44	localized		78	NA	NA	NA	NA
QPN120	Healthy	0.42	68	NA	NA	NA	NA
QPN129	Healthy	0.47	71	NA	NA	NA	NA
QPN141	Healthy	1.16	69	NA	NA	NA	NA
QPN191	BiopsyNegative	21.18	73	NA	NA	NA	NA
QPN75	BiopsyNegative	4.63	74	NA	NA	NA	NA
QPN31	BiopsyNegative	6.77	73	NA	NA	NA	NA
QPN201	BiopsyNegative	10.04	66	NA	NA	NA	NA
QP26	locally_advanced		70	NA	NA	NA	NA
QP29	locally_advanced			NA	NA	NA	NA
QP35	locally_advanced		63	NA	NA	NA	NA
QP45	localized		70	NA	NA	NA	NA
QP47	localized		66	NA	NA	NA	NA
QP48	localized		62	NA	NA	NA	NA
QP50	localized		64	NA	NA	NA	NA
QP51	localized		74	NA	NA	NA	NA
QPN124	Healthy	0.93	64	NA	NA	NA	NA
QPN127	Healthy	1.43	60	NA	NA	NA	NA
QPN130	Healthy	0.49	64	NA	NA	NA	NA
QPN150	Healthy	0.94	72	NA	NA	NA	NA
QPN159	Healthy	0.43	60	NA	NA	NA	NA
QPN203	BiopsyNegative	12.15	56	NA	NA	NA	NA
QN64	BiopsyNegative	20	62	NA	NA	NA	NA
QN113	BiopsyNegative	8.19	69	NA	NA	NA	NA

## Sheet: Table S6
Table S6. Patients clinical summary of 20 metastatic samples.
Sample	Group	PSA	Age	GS	Pathology.T	Pathology.N	Pathology.M
PC_D153_L	mHSPC	11.243	61	8	T3a	N0	NA
PC_D189_L	mHSPC	36.88	68	9	T3b	N1	NA
PC_D201_W2	mHSPC	300	67	8	T2	N0	NA
PC_D233_W	mHSPC	6.517	64	7	T2	N0	M1b
PC_D257_L	mHSPC	16.76	69	7	T2	N0	M1a
PC_D261_W	mHSPC	60.076	55	9	T3b	N1	M1a
PC_D281_L	mHSPC	123.33	73	9	T3a	N1	M1a
PC_D281_L2	mHSPC	123.33	73	9	T3a	N1	M1a
PC_D285_W	mHSPC	23.43	73	7	T3a	N0	M1a
PC_D293_W	mHSPC	37.88	62	7	T2	N0	M1a
PC_D301_W	mHSPC	13.15	71	7	T2	N0	M1b
PC_D345_L	mHSPC	16.45	71	9	T4	N0	M1a
PC_D353_L	mHSPC	73.29	66	9	T3a	N0	M1a
PC_D361_L	mHSPC	78.23	75	7	T2	N0	NA
PC_D365_W	mHSPC	100	59	9	T3a	N1	M1a
PC_D389_L	mHSPC	2.67	62	6	T2	N0	M1a
PC_D5_L	mHSPC	95.36	69	9	T3a	N1	M1a
PC_D61_W	mHSPC	24.3	72	7	T3a	N0	M1a
PC_D65_W	mHSPC	30.56	67	7	T3a	N0	M1a
PC_Z634_L	mHSPC	74.28	70	9	NA	NA	NA
